# Supplementary material for: Temporal trade-off between gymnosperm resistance and resilience increases forest sensitivity to extreme drought
Source: Springer Nature journal article supplement (doi:10.1038/s41559-020-1217-3), 2020-06-15
Supplement: 41559_2020_1217_MOESM1_ESM.pdf [file 41559_2020_1217_MOESM1_ESM.pdf]

In the format provided by the authors and unedited.

# Temporal trade-off between gymnosperm resistance and resilience increases forest sensitivity to extreme drought

Xiangyi Li <sup>1</sup>, Shilong Piao <sup>1,2</sup> ✉, Kai Wang <sup>1</sup>, Xuhui Wang<sup>1</sup>, Tao Wang<sup>2</sup>, Philippe Ciais <sup>3</sup>, Anping Chen <sup>4</sup>, Xu Lian<sup>1</sup>, Shushi Peng <sup>1</sup> and Josep Peñuelas <sup>5,6</sup>

---

<sup>1</sup>Sino-French Institute for Earth System Science, College of Urban and Environmental Sciences, Peking University, Beijing, China. <sup>2</sup>Key Laboratory of Alpine Ecology and Biodiversity, Institute of Tibetan Plateau Research, Center for Excellence in Tibetan Earth Science, Chinese Academy of Sciences, Beijing, China. <sup>3</sup>Laboratoire des Sciences du Climat et de l'Environnement, CEA CNRS UVSQ, Gif-sur-Yvette, France. <sup>4</sup>Department of Biology and Graduate Degree Program in Ecology, Colorado State University, Fort Collins, CO, USA. <sup>5</sup>CSIC, Global Ecology Unit CREAM-CSIC-UAB, Bellaterra, Barcelona, Spain. <sup>6</sup>CREAF, Cerdanyola del Vallès, Barcelona, Spain. ✉e-mail: [slpiao@pku.edu.cn](mailto:slpiao@pku.edu.cn)

## Supplementary information for

### **Temporal trade-off between gymnosperm resistance and resilience increases forest sensitivity to extreme drought**

Xiangyi Li<sup>1</sup>, Shilong Piao<sup>1, 2\*</sup>, Kai Wang<sup>1</sup>, Xuhui Wang<sup>1</sup>, Tao Wang<sup>2</sup>, Philippe Ciais<sup>3</sup>, Anping Chen<sup>4</sup>, Xu Lian<sup>1</sup>, Shushi Peng<sup>1</sup>, Josep Peñuelas<sup>5, 6</sup>

<sup>1</sup>Sino-French Institute for Earth System Science, College of Urban and Environmental Sciences, Peking University, Beijing 100871, China

<sup>2</sup>Key Laboratory of Alpine Ecology and Biodiversity, Institute of Tibetan Plateau Research, Center for Excellence in Tibetan Earth Science, Chinese Academy of Sciences, 100085, Beijing China

<sup>3</sup>Laboratoire des Sciences du Climat et de l'Environnement, CEA CNRS UVSQ, Gif-sur-Yvette, 91191, France

<sup>4</sup>Department of Biology and Graduate Degree Program in Ecology, Colorado State University, Fort Collins, CO 80523, USA

<sup>5</sup>CSIC, Global Ecology Unit CREAF-CSIC-UAB, Bellaterra, Barcelona 08193, Catalonia, Spain

<sup>6</sup>CREAF, Cerdanyola del Vallès, Barcelona 08193, Catalonia, Spain

\*Email address: slpiao@pku.edu.cn

#### **Contents in this file include:**

Supplementary Figures 1-3

Supplementary Tables 1-2

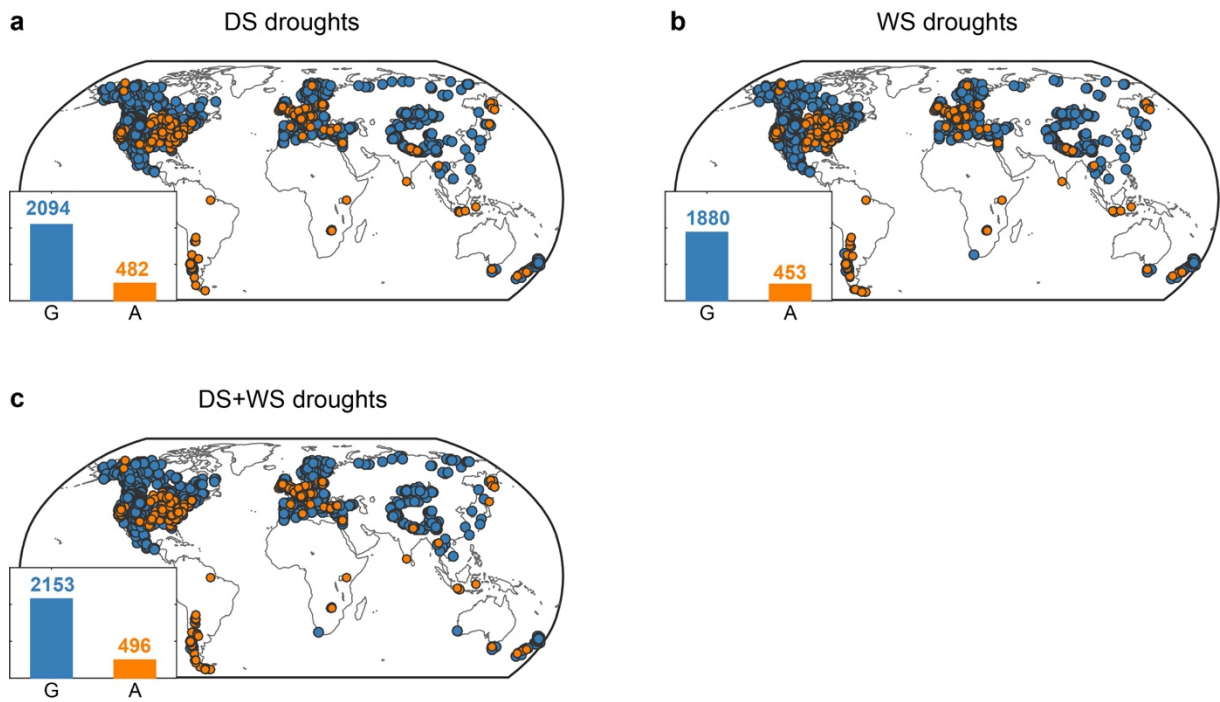

**Figure 1.** Spatial distributions of the tree-ring sites that experienced (a) droughts in the dry season (DS droughts), (b) droughts in the wet season (WS droughts), and (c) droughts in both dry and wet seasons (DS+WS droughts) for gymnosperm (G) and angiosperm (A) forests. The gymnosperm sites are marked in blue, and the angiosperm sites are marked in orange. The insets show the total number of gymnosperm and angiosperm sites that experienced droughts.

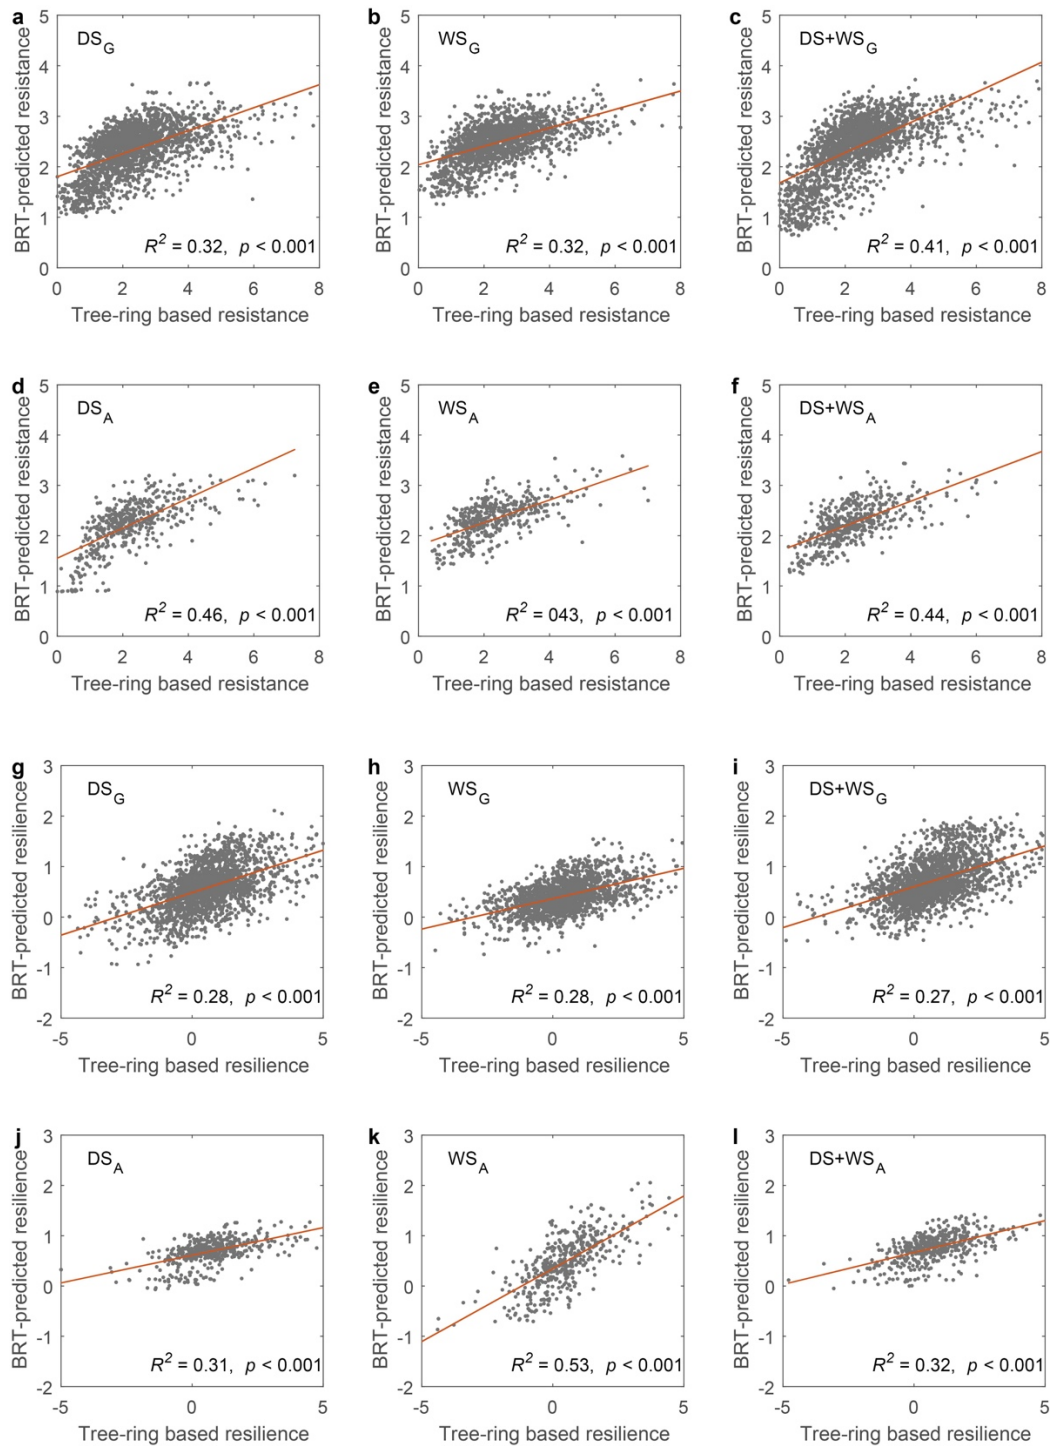

**Figure 2.** Tree-ring-based resistance vs. boosted regression tree (BRT) predicted resistance for (a) gymnosperms in DS droughts ( $DS_G$ ), (b) gymnosperms in WS droughts ( $WS_G$ ), (c) gymnosperms in DS+WS droughts ( $DS+WS_G$ ), (d) angiosperms in DS droughts ( $DS_A$ ), (e) angiosperms in WS droughts ( $WS_A$ ), and (f) angiosperms in DS+WS droughts ( $DS+WS_A$ ). (g-i) Analysis as in (a-f) but for tree-ring-based resilience vs. BRT-predicted resilience.

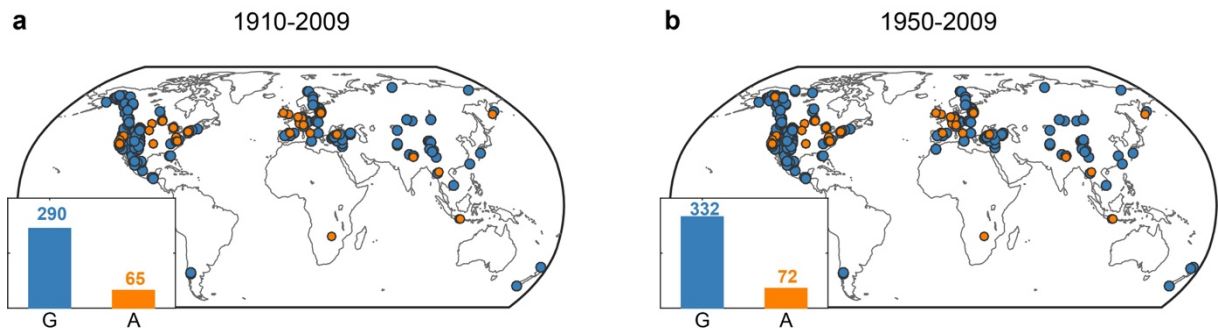

**Figure 3.** Spatial distributions of tree-ring sites that experienced droughts during (a) all four periods (before 1950, 1950-1969, 1970-1989, and 1990-2009) from 1910-2009, and (b) all three periods (1950-1969, 1970-1989, and 1990-2009) from 1950-2009. The gymnosperm sites (G) are marked in blue, and the angiosperm sites (A) are marked in orange. The insets show the total number of gymnosperm (blue) and angiosperm (orange) sites that experienced droughts.

## Tables

**Supplementary Table 1** Information for the 38 main species ( $\geq 20$  sites with tree-ring data) of used in this study. Species codes are derived from the ITRDB and the latin names of species refer to Grissino-Mayer (1993, ref<sup>1</sup>) and The Plant List (theplantlist.org).

| No. | Species Code | Latin Name & Authority                                 | Genus              | Family        | Group       | Number of sites |
|-----|--------------|--------------------------------------------------------|--------------------|---------------|-------------|-----------------|
| 1   | PSME         | <i>Pseudotsuga menziesii</i> (Mirb.) Franco            | <i>Pseudotsuga</i> | Pinaceae      | Gymnosperms | 209             |
| 2   | PISY         | <i>Pinus sylvestris</i> L.                             | <i>Pinus</i>       | Pinaceae      | Gymnosperms | 184             |
| 3   | PIPO         | <i>Pinus ponderosa</i> Dougl. ex Laws.                 | <i>Pinus</i>       | Pinaceae      | Gymnosperms | 172             |
| 4   | PCGL         | <i>Picea glauca</i> (Moench) Voss                      | <i>Picea</i>       | Pinaceae      | Gymnosperms | 171             |
| 5   | PCAB         | <i>Picea abies</i> (L.) Karst                          | <i>Picea</i>       | Pinaceae      | Gymnosperms | 148             |
| 6   | TSME         | <i>Tsuga mertensiana</i> (Bong.) Carr.                 | <i>Tsuga</i>       | Pinaceae      | Gymnosperms | 98              |
| 7   | PCEN         | <i>Picea engelmannii</i> Parry ex Engelm.              | <i>Picea</i>       | Pinaceae      | Gymnosperms | 75              |
| 8   | FASY         | <i>Fagus sylvatica</i> L.                              | <i>Fagus</i>       | Fagaceae      | Angiosperms | 61              |
| 9   | ABLA         | <i>Abies lasiocarpa</i> (Hook.) Nutt.                  | <i>Abies</i>       | Pinaceae      | Gymnosperms | 60              |
| 10  | PINI         | <i>Pinus nigra</i> Arnold                              | <i>Pinus</i>       | Pinaceae      | Gymnosperms | 60              |
| 11  | LASI         | <i>Larix sibirica</i> Ledeb.                           | <i>Larix</i>       | Pinaceae      | Gymnosperms | 55              |
| 12  | PCMA         | <i>Picea mariana</i> (Mill.) Britt., Sterns & Poggenb. | <i>Picea</i>       | Pinaceae      | Gymnosperms | 51              |
| 13  | PIED         | <i>Pinus edulis</i> Engelm. in Wisliz.                 | <i>Pinus</i>       | Pinaceae      | Gymnosperms | 48              |
| 14  | QURO         | <i>Quercus robur</i> L.                                | <i>Quercus</i>     | Fagaceae      | Angiosperms | 47              |
| 15  | ABAL         | <i>Abies alba</i> Mill.                                | <i>Abies</i>       | Pinaceae      | Gymnosperms | 45              |
| 16  | NOPU         | <i>Nothofagus pumilio</i> (Poepp. & Endl.) Oerst.      | <i>Nothofagus</i>  | Nothofagaceae | Angiosperms | 45              |
| 17  | PCSI         | <i>Picea sitchensis</i> (Bong.) Carr                   | <i>Picea</i>       | Pinaceae      | Gymnosperms | 45              |
| 18  | LADE         | <i>Larix decidua</i> Mill.                             | <i>Larix</i>       | Pinaceae      | Gymnosperms | 42              |
| 19  | QUMA         | <i>Quercus macrocarpa</i> Michx                        | <i>Quercus</i>     | Fagaceae      | Angiosperms | 39              |
| 20  | QUPE         | <i>Quercus petraea</i> (Matluschka) Liebl.             | <i>Quercus</i>     | Fagaceae      | Angiosperms | 39              |
| 21  | QUSP         | <i>Quercus</i> L.                                      | <i>Quercus</i>     | Fagaceae      | Angiosperms | 35              |
| 22  | LALY         | <i>Larix lyalli</i> Parl.                              | <i>Larix</i>       | Pinaceae      | Gymnosperms | 33              |
| 23  | QUST         | <i>Quercus stellata</i> Wangenh                        | <i>Quercus</i>     | Fagaceae      | Angiosperms | 33              |
| 24  | LAGM         | <i>Larix gmelinii</i> (Rupr.) Kuzen.                   | <i>Larix</i>       | Pinaceae      | Gymnosperms | 31              |
| 25  | QUDG         | <i>Quercus douglasii</i> Hook. and Am.                 | <i>Quercus</i>     | Fagaceae      | Angiosperms | 29              |
| 26  | PIFL         | <i>Pinus flexilis</i> James                            | <i>Pinus</i>       | Pinaceae      | Gymnosperms | 28              |

|    |      |                                                |                   |               |             |    |
|----|------|------------------------------------------------|-------------------|---------------|-------------|----|
| 27 | QUAL | <i>Quercus alba</i> L.                         | <i>Quercus</i>    | Fagaceae      | Angiosperms | 27 |
| 28 | PIBN | <i>Pinus bankasiana</i> Lamb.                  | <i>Pinus</i>      | Pinaceae      | Gymnosperms | 25 |
| 29 | ABSB | <i>Abies spectabilis</i> (D.Don) Mirb.         | <i>Abies</i>      | Pinaceae      | Gymnosperms | 24 |
| 30 | PIST | <i>Pinus strobus</i> L.                        | <i>Pinus</i>      | Pinaceae      | Gymnosperms | 24 |
| 31 | TSCA | <i>Tsuga Canadensis</i> (L.) Carrière          | <i>Tsuga</i>      | Pinaceae      | Gymnosperms | 24 |
| 32 | LIBI | <i>Libocedrus bidwillii</i> Hook.f.            | <i>Libocedrus</i> | Cupressaceae  | Gymnosperms | 23 |
| 33 | NOSO | <i>Nothofagus solandri</i> (Hook.f.)<br>Oerst. | <i>Nothofagus</i> | Nothofagaceae | Angiosperms | 23 |
| 34 | PIAL | <i>Pinus albicaulis</i> Engelm.                | <i>Pinus</i>      | Pinaceae      | Gymnosperms | 23 |
| 35 | JUOC | <i>Juniperus occidentalis</i> Hook.            | <i>Juniperus</i>  | Cupressaceae  | Gymnosperms | 22 |
| 36 | JUSP | <i>Juniperus</i> L.                            | <i>Juniperus</i>  | Cupressaceae  | Gymnosperms | 21 |
| 37 | PICE | <i>Pinus cembra</i> L.                         | <i>Pinus</i>      | Pinaceae      | Gymnosperms | 20 |
| 38 | PICO | <i>Pinus contorta</i> Dougl. ex Loud.          | <i>Pinus</i>      | Pinaceae      | Gymnosperms | 20 |

**Supplementary Table 2** Predictive factors used in the boosted regression tree (BRT) model.

| <b>Factor</b> | <b>Description</b>                                          | <b>Unit</b>                      | <b>Source</b>                                                           |
|---------------|-------------------------------------------------------------|----------------------------------|-------------------------------------------------------------------------|
| Age           | Average stand age in droughts                               | y                                | ITRDB                                                                   |
| Severity      | 12-month SPEI                                               | –                                | SPEI data set                                                           |
| Tree density  | Stand density per hectare                                   | trees ha <sup>-1</sup>           | Crowther et al., 2015 (ref <sup>2</sup> )                               |
| Nm            | Foliar nitrogen concentration per unit dry mass             | mg g <sup>-1</sup>               | Butler et al., 2017 (ref <sup>3</sup> )                                 |
| Pm            | Foliar phosphorus concentration per unit dry mass           | mg g <sup>-1</sup>               | Butler et al., 2017 (ref <sup>3</sup> )                                 |
| SLA           | Specific leaf area                                          | mm <sup>2</sup> mg <sup>-1</sup> | Butler et al., 2017 (ref <sup>3</sup> )                                 |
| WD            | Wood density                                                | g cm <sup>-3</sup>               | Zanne et al., 2009 (ref <sup>4</sup> )                                  |
| Rooting depth | Maximum rooting depth                                       | m                                | Earth2Observe                                                           |
| Height        | Canopy height                                               | m                                | Simard et al., 2011(ref <sup>5</sup> )                                  |
| HSM           | Hydraulic safety margin                                     | Mpa                              | Chaot et al., 2012 (ref <sup>6</sup> )                                  |
| P50           | Water potential at 50% loss of hydraulic conductivity       | Mpa                              | Chaot et al., 2012 (ref <sup>6</sup> )                                  |
| Isohydricity  | Degree of isohydricity                                      | –                                | Konings et al., 2017 (ref <sup>7</sup> )                                |
| AWC           | The classes of available water-storage capacity of the soil | –                                | Harmonized World Soil Database, Wieder et al., 2014 (ref <sup>8</sup> ) |
| CEC           | Cation-exchange capacity of the topsoil                     | cmol kg <sup>-1</sup>            | Harmonized World Soil Database, Wieder et al., 2014 (ref <sup>8</sup> ) |
| PREC          | Mean annual precipitation                                   | mm y <sup>-1</sup>               | CRU TS 4.01(ref <sup>9</sup> )                                          |
| TEMP          | Mean annual temperature                                     | °C                               | CRU TS 4.01(ref <sup>9</sup> )                                          |



## References

1. Grissino-Mayer HD. An updated list of species used in tree-ring research. *Tree Ring Bull* **53**, 17–43 (1993).
2. Crowther, T. W. et al. Mapping tree density at a global scale. *Nature* **525**, 201-205 (2015)
3. Butler, E. E. et al. Mapping local and global variability in plant trait distributions. *Proc. Natl. Acad. Sci. USA* **114**, E10937-E10946 (2017)
4. Zanne, A. E. et al. Global wood density database. *Dryad* <https://doi.org/10.5061/dryad.234/1> (2009)
5. Simard, M., Pinto, N., Fisher, J. B. & Baccini, A. Mapping forest canopy height globally with spaceborne lidar. *J. Geophys. Res.* **116**, G04021 (2011)
6. Choat, B. et al. Global convergence in the vulnerability of forests to drought. *Nature* **491**, 752–755 (2012)
7. Konings, A. G. & Gentine, P. Global variations in ecosystem-scale isohydricity. *Glob. Change Biol.* **23**, 891-905 (2017)
8. Wieder, W. R., J. Boehnert, G. B. Bonan, and M. Langseth. RegridDED harmonized world soil database v1.2. [Available at <http://daac.ornl.gov>] from Oak Ridge National Laboratory Distributed Active Archive Center, Oak Ridge, Tenn (2014)
9. Harris, I., Jones, P. D., Osborn, T. J. & Lister, D. H. Updated high-resolution grids of monthly climatic observations—the CRU TS3.10 Dataset. *Int. J. Climatol.* **34**, 623-642 (2014)
